## CORRESPONDENCE

easily achieved if a fluid that is more normal than "normal" saline becomes commercially available.

**Pema Dorje, M.D.**

Assistant Professor  
pemdor@umich.edu

**Gaury Adhikary, M.D.**

Assistant Professor  
Department of Anesthesiology  
University of Michigan Medical Center  
Ann Arbor, Michigan 48109-0048

**Deepak K. Tempe, M.D.**

Professor of Anaesthesiology  
G. B. Pant Hospital  
New Delhi, India

Anesthesiology

2000; 92:626

© 2000 American Society of Anesthesiologists, Inc.  
Lippincott Williams & Wilkins, Inc.

*In Reply:*—We are grateful to have the opportunity to respond to the thoughtful comments by Drs. Story *et al.*, Drummond, and Dorje *et al.* We entirely agree with Story *et al.* that the Stewart approach<sup>1</sup> provides a fundamental insight into acid-base equilibrium, and that in many cases this approach better explains the causes for metabolic pH changes than the Henderson-Hasselbalch<sup>2</sup> approach. Nevertheless, the Henderson-Hasselbalch equation is still correct, and most clinicians work well with this equation, despite the fact that the equation does not reflect the whole background of acid-base homeostasis. Consequently, it seemed appropriate to present a well-balanced discussion of our results in the light of the "traditional" Henderson-Hasselbalch approach and the "modern" Stewart approach.

We respond to the letter by Dr. Drummond by stating that we did not claim to be the first to evaluate acid-base changes under large saline infusions. However, probably because of unfortunately chosen key words, we did not come across the report by McFarlane and Lee while preparing our manuscript.<sup>3</sup>

The question asked by Dorje *et al.* whether artificial hyperchloremia has any important adverse effects cannot be answered with our data. Perioperative hyperchloremia seems to be benign in patients with normal renal function; however, we agree that for critically ill patients, especially those with acute or chronic renal failure, more "physiologic" crystalloid solutions would be advantageous. The proposal of Dorje *et al.* ( $\text{Na}^+ = 140$  mm,  $\text{Cl}^- = 100$  mm, and lactate or bicarbonate = 40 mm) would probably lead to an ongoing metabolic alkalosis in case of 40 mm bicarbonate content. Our experience with substitutes containing lactate suggests that these solutions will cause a slight but continuous increase in serum lactate

Anesthesiology

2000; 92:626-7

© 2000 American Society of Anesthesiologists, Inc.  
Lippincott Williams & Wilkins, Inc.

*In Reply:*—We appreciate the comments of Drummond<sup>1</sup> and Story *et al.*<sup>2</sup> Both letters address issues that clarify the report by Scheingraber *et al.*<sup>3</sup>

First, Drummond<sup>1</sup> appropriately calls additional attention to the

## References

1. Scheingraber S, Rehm M, Sehmisch C, Finsterer U: Rapid Saline Infusion Produces Hyperchloremic Acidosis in Patients Undergoing Gynecologic Procedures. *ANESTHESIOLOGY* 1999; 90:1265-70
2. Wilcox CS: Regulation of renal blood flow by plasma chloride. *J Clin Invest* 1983; 71:726-35
3. Wilcox CS: Release of renin and angiotensin II into plasma and lymph during hyperchloremia. *Am J Physiol* 1987; 253:F734-41
4. Mathes DD, Morel RC, Rohr MS: Dilutional Acidosis: Is it a real clinical entity? *ANESTHESIOLOGY* 1997; 86:501-3

(Accepted for publication September 23, 1999.)

concentration. Unfortunately, this artificial increase in serum lactate concentration will lead to loss of an essential routine monitoring for inadequate tissue oxygenation. In summary, we conclude that the ideal electrolyte composition of crystalloids has not yet been found, and further investigations in this field are necessary.

**Udilo Finsterer, M.D.**

Professor of Anesthesiology  
jfreeden@ana.med.uni-muenchen.de

**Stefan Scheingraber, M.D.**

Staff Anesthesiologist

**Markus Rehm, M.D.**

Staff Anesthesiologist  
Clinic of Anesthesiology  
Ludwig-Maximilians University  
Marchionistr 15  
Munich D-81377, Germany

## References

1. Stewart PA: Modern quantitative acid-base chemistry. *Can J Physiol Pharmacol* 1983; 61:1444-61
2. Sigaard-Andersen O: The Acid-Base Status of the Blood. 4th Edition. Baltimore: Williams and Wilkins, 1976
3. McFarlane C, Lee A: A comparison of plasmalyte 148 and 0.9% saline for intraoperative fluid replacement. *Anaesthesia* 1994; 49:779-81

(Accepted for publication September 23, 1999.)

important study by his colleagues at the Royal Infirmary in Edinburgh.<sup>4</sup> Both McFarlane and Lee<sup>4</sup> and Scheingraber *et al.*<sup>3</sup> conducted randomized clinical trials comparing 0.9% saline balanced salt solutions. The two studies differ in that McFarlane and Lee<sup>4</sup> enrolled patients under-

## CORRESPONDENCE

going "major hepatobiliary or pancreatic surgery" averaging approximately 3.5 h in duration, whereas Scheingraber *et al.*<sup>3</sup> enrolled patients undergoing "lower abdominal gynecologic surgery" averaging approximately 2.25 h. Despite the somewhat shorter duration of surgery, the gynecologic patients randomized to the saline group received a slightly greater total volume<sup>3</sup> ( $71 \pm 14$  ml/kg during the first 120 min of infusion) than the patients receiving saline in the study by McFarlane *et al.*<sup>4</sup> ( $14.6 \pm 41$  ml  $\cdot$  kg<sup>-1</sup>  $\cdot$  h<sup>-1</sup> during an interval of  $219 \pm 77$  min). As a consequence, the increase in plasma chloride and the decrease in plasma bicarbonate were greater in the gynecologic patients. Together, the reports suggest that hyperchloremic acidosis is a dose-dependent consequence of saline administration. Whether this acid-base abnormality is in fact harmful remains unclear, although we<sup>5</sup> were unable to cite any compelling evidence of adverse effects. We are skeptical that differences in outcome, if any, related to the choice of saline or balanced salt solution would justify the cost of a randomized clinical trial.

However, one noteworthy characteristic of Plasmalyte 148, the balanced salt solution used by McFarlane and Lee,<sup>4</sup> is that the sodium concentration is 140 mEq/l. Consequently, in contrast to lactated Ringer's solution, infusion of substantial volumes does not decrease serum sodium and serum osmolality, and does not raise the same theoretical concerns about increases in brain water.<sup>5</sup>

We agree with Story *et al.*<sup>2</sup> that the Stewart approach<sup>6,7</sup> offers interesting insights into acid-base chemistry; however, we disagree that the relative merits of the Stewart approach *versus* the conventional Henderson-Hasselbalch approach constitute a "central issue." Regardless of its attractive biochemical features, the Stewart approach has not yet become popular for routine clinical use, perhaps because it is less simple to quantify at the bedside and because it prompts no important differences in treatment.

Anesthesiology  
2000; 92:627

© 2000 American Society of Anesthesiologists, Inc.  
Lippincott Williams & Wilkins, Inc.

## Dynamic Response to Volatile Anesthetics Has Been Examined Before

*To the Editor:*—Olsen and Dahan describe an analysis of the dynamic electroencephalographic (EEG) response to step changes in end-tidal concentration of isoflurane or sevoflurane. Understanding the dynamic and steady state responses of a system to a changing input is a prerequisite to designing a robust automatic control system. Unfortunately, the use of a single, fixed-size step change in concentration is suboptimal as a "forcing" function for several technical reasons, including (1) the absence within this function of many frequencies in the range of interest, and (2) the possible blinding to nonlinearities. The discipline of control systems engineering provides many better alternatives to the development of a dynamic response measurement of a complex "black box" system similar to an EEG response in a patient. We reported the use of one such technique (pseudorandom binary sequence testing) to measure the dynamic (impulse) response of canine EEG (spectral edge frequency) to volatile anesthetics.<sup>1</sup> This work was later reported in a Ph.D. thesis.<sup>2</sup> Historians of our specialty will also appreciate that Dr. N. T. Smith was administering sine-wave concentrations of agents at various frequencies to human volunteers and measuring EEG response in 1976.<sup>3</sup>

**Donald S. Prough, M.D.**

Rebecca Terry White Distinguished Chair  
Department of Anesthesiology  
Dsprough@utmb.edu

**Akhil Bidani, M.D., Ph.D.**

Professor and Chief  
Section on Pulmonary Medicine and Critical Care  
The University of Texas Medical Branch  
Galveston, Texas 77555-0591

## References

1. Drummond GB: Article supports findings of previous comparison. *ANESTHESIOLOGY* 2000; 92:625
2. Story DA, Liskaser F, Bellomo R: Saline infusion, acidosis and the Stewart approach. *ANESTHESIOLOGY* 2000; 92:624
3. Scheingraber S, Rehm M, Schmisch C, Finsterer U: Rapid saline infusion produces hyperchloremic acidosis in patients undergoing gynecologic surgery. *ANESTHESIOLOGY* 1999; 90:1265-70
4. McFarlane C, Lee A: A comparison of Plasmalyte 148 and 0.9% saline for intra-operative fluid replacement. *Anaesthesia* 1994; 49:779-81
5. Prough DS, Bidani A: Hyperchloremic metabolic acidosis is a predictable consequence of intraoperative infusion of 0.9% saline. *ANESTHESIOLOGY* 1999;90:1247-9
6. Stewart PA: Modern quantitative acid-base chemistry. *Can J Physiol Pharmacol* 1983; 61:1444-61
7. Fencel V, Leith DE: Stewart's quantitative acid-base chemistry: Applications in biology and medicine. *Respir Physiol* 1993; 91:1-16

(Accepted for publication September 23, 1999.)

**Ira J. Rampil, M.S.E.E., M.D.**

Department of Anesthesia  
University of California at San Francisco  
521 Parnassus, Room C450  
San Francisco, California 94143-0648  
rampili@anesthesia.ucsf.edu

## References

1. Rampil IJ, Sasse FJ, Smith NT, Hoff BH, Rusy BF, Flemming DC: A new method for testing the response to an inhalational agent (abstract). *ANESTHESIOLOGY* 1979; 51:S26
2. Schils GF: A study of Servo-anesthesia (OCLC no. 10152108). Madison, University of Wisconsin, 1983
3. Nuñez P: Electric Fields of the Brain. New York, Oxford University Press, 1981, pp 233

(Accepted for publication September 23, 1999.)
